# Supplementary material for: Foreign DNA acquisition by the I-F CRISPR–Cas system requires all components of the interference machinery
Source: PubMed Central journal article supplement — Nucleic Acids Res. 2015 Nov 19;43(22):10848–60. doi: 10.1093/nar/gkv1261 (PMC4678832; doi:10.1093/nar/gkv1261), 2015-11-19
Supplement: supp_gkv1261_nar-02705-h-2015-File002.pdf [file supp_gkv1261_nar-02705-h-2015-File002.pdf]

## Supplementary materials

**Table S1.** Strains used in this study.

| Strains | Description                                                                                                                                                                                                                                                                     | Reference                              |
|---------|---------------------------------------------------------------------------------------------------------------------------------------------------------------------------------------------------------------------------------------------------------------------------------|----------------------------------------|
| BL21-AI | <i>F</i> <i>ompT hsdSB</i> ( $r_B$ $m_B$ ) <i>gal dcm araB::T7RNAP-tetA</i>                                                                                                                                                                                                     | Invitrogen                             |
| KD604   | BL21-AI_ΔCRISPR carrying <i>Pseudomonas aeruginosa</i> CRISPR array with a single spacer: ACGCAGTTGCTGAGTGTGATCGATGCCATCAG                                                                                                                                                      | This study                             |
| KD606   | BL21-AI_ΔCRISPR carrying <i>Pseudomonas aeruginosa</i> CRISPR array with a single spacer: ACCGGACCTTCAATCGGCCCTTCGCTGATGGC                                                                                                                                                      | This study                             |
| KD628   | BL21-AI_ΔCRISPR carrying <i>Pseudomonas aeruginosa</i> CRISPR array with a single repeat                                                                                                                                                                                        | This study                             |
| KD675   | The same as KD604 but it contains a protospacer with a mismatch at position +1 (TCGCAGTTGCTGAGTGTGATCGATGCCATCAG) preceded by a functional GG PAM introduced in it's genome into <i>ompL/yihN</i> intergenic region corresponding to the positions 4372171-4372261 of NC_012947 | This study                             |
| ED1a    | <i>E. coli</i> ED1a strain with native I-F CRISPR-Cas system                                                                                                                                                                                                                    | Touchon, M., and Rocha, E. P. C., 2010 |

To construct *E. coli* strains carrying *Pseudomonas aeruginosa* CRISPR arrays, the *E. coli* BL21-AI strain (Invitrogen) lacking endogenous *cas* genes and carrying the T7 RNAP gene under the control of the arabinose-inducible *araBAD* promoter was used. The resident CRISPR1 array in the *E. coli* BL21-AI cells (corresponding to the positions 1002803-1003730 of NC\_012947) was replaced by a DNA fragment containing *P. aeruginosa* CRISPR leader followed by a repeat-spacer-repeat array (or only leader-repeat fragment for KD628) flanked by upstream T7 RNAP promoter and *lacO*, and downstream T7 terminator sequences. *E. coli* genomic modifications were performed using a technique based on the previously described method of Datsenko and Wanner, 2000.

**Table S2.** Statistics for reads corresponding to spacers derived from various plasmids in the course of adaptation by the *P. aeruginosa* CRISPR-Cas system (for results shown in Fig. 5).

|                               | <u>pCas</u> | <u>pCsy</u> | <u>pACYC</u> | <u>pSPA</u> | <u>pSPAmut</u> |
|-------------------------------|-------------|-------------|--------------|-------------|----------------|
| Plasmid-derived spacers       | 474318      | 166866      | 1018         | 3756        | 116066         |
| Strand bias, %                | 35.56       | 38.67       | 51.57        | 90.07       | 66.06          |
| GG PAM frequency, %           | 97.58       | 97.90       | 94.30        | 99.41       | 95.46          |
| Derived spacers (shifters), % | 1.20        | 1.10        | 1.77         | 0.24        | 3.46           |
| Derived spacers (flippers), % | 0.63        | 0.46        | 3.54         | 0.16        | 1.00           |
| Strand bias corrected, %      | 35.48       | 38.67       | 48.62        | 90.23       | 66.23          |
| GG PAM frequency corrected, % | 99.41       | 99.46       | 99.61        | 99.81       | 99.92          |

“Derived spacers” refers to spacers that originate from recognition of protospacers with correct GG PAM but are produced either by short shifts in the upstream or downstream direction (“shifters”) or are inserted in an inverted orientation in the CRISPR array (“flippers”).

**Table S3.** Statistics for reads corresponding to spacers derived from the genome of *E. coli* KD675 cells carrying a self-targeting spacer (for results shown in Fig. 6).

|                                      |              |
|--------------------------------------|--------------|
| <b>KD675 genome-derived spacers</b>  | <b>37616</b> |
| <b>Strand bias, %</b>                | <b>50.57</b> |
| <b>GG PAM frequency, %</b>           | <b>91.44</b> |
| <b>Derived spacers (shifters), %</b> | <b>5.01</b>  |
| <b>Derived spacers (flippers), %</b> | <b>0.93</b>  |
| <b>Strand bias corrected, %</b>      | <b>50.12</b> |
| <b>GG PAM frequency corrected, %</b> | <b>97.38</b> |

**Table S4.** Statistics for reads corresponding to spacers derived from the protospacer plasmid pSEDmut by the type I-F CRISPR-Cas system from *E. coli* ED1a (for results shown in Fig. 7).

|                               |         |
|-------------------------------|---------|
| pSEDmut-derived spacers       | 1587038 |
| Strand bias, %                | 35.72   |
| GG PAM frequency, %           | 88.77   |
| Derived spacers (shifters), % | 8.53    |
| Derived spacers (flippers), % | 2.56    |
| Strand bias corrected, %      | 34.83   |
| GG PAM frequency corrected, % | 99.86   |
